# Supplementary material for: Experimental and molecular dynamics studies on aggregation behaviour of salicylaldehyde azine ester
Source: Royal Society of Chemistry journal article supplement (doi:10.1039/d2sm00078d), 2022-01-01
Supplement: d2sm00078d1.pdf [file d2sm00078d1.pdf]

## Experimental and molecular dynamics studies on aggregation behaviour of salicylaldehyde azine ester

Sneha Kagatkar<sup>1</sup>, Anoop Kishore Vatti<sup>2</sup>, Dhanya Sunil<sup>1\*</sup>

<sup>1</sup>Department of Chemistry, Manipal Institute of Technology, Manipal Academy of Higher Education, Manipal-576104, Karnataka, India.

<sup>2</sup>Department of Chemical Engineering, Manipal Institute of Technology, Manipal Academy of Higher Education, Manipal, 576104, Karnataka, India.

### Supplementary figures

| Sl. no | Figure number | Figure caption                                                                                     |
|--------|---------------|----------------------------------------------------------------------------------------------------|
| 1      | SF1           | Optical microscopic images of SAE in pure THF and in THF-water mixture with $f_w = 10, 20$ and 50% |
| 2      | SF2           | Snapshots of SAE in $f_w = 0, 10, 20$ and 50%                                                      |

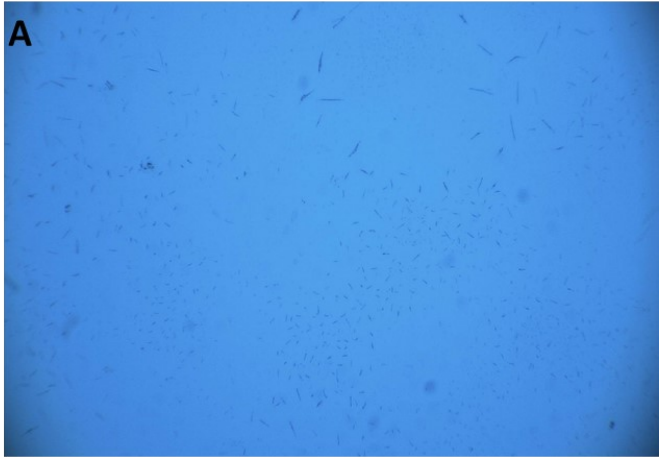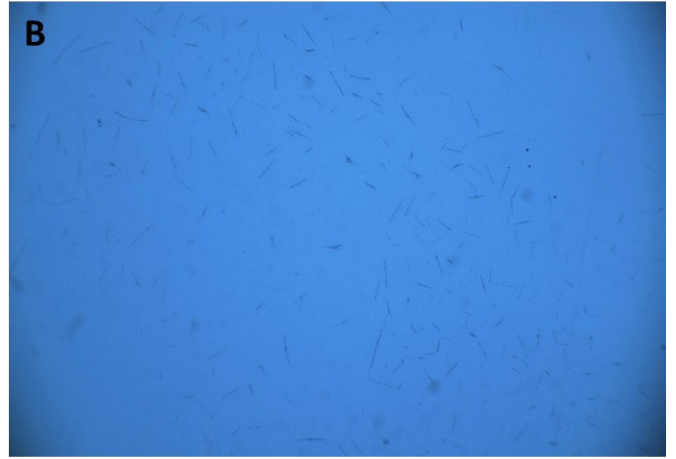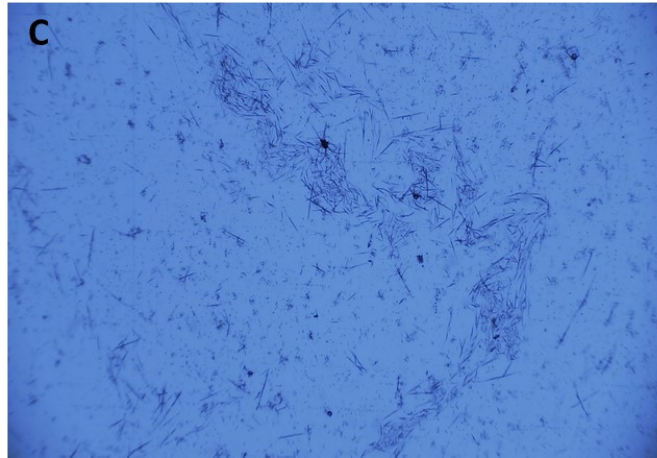

**SF1:** Optical microscopic images of SAE in pure THF and in THF-water mixture with  $f_w = 10$ , 20 and 50%

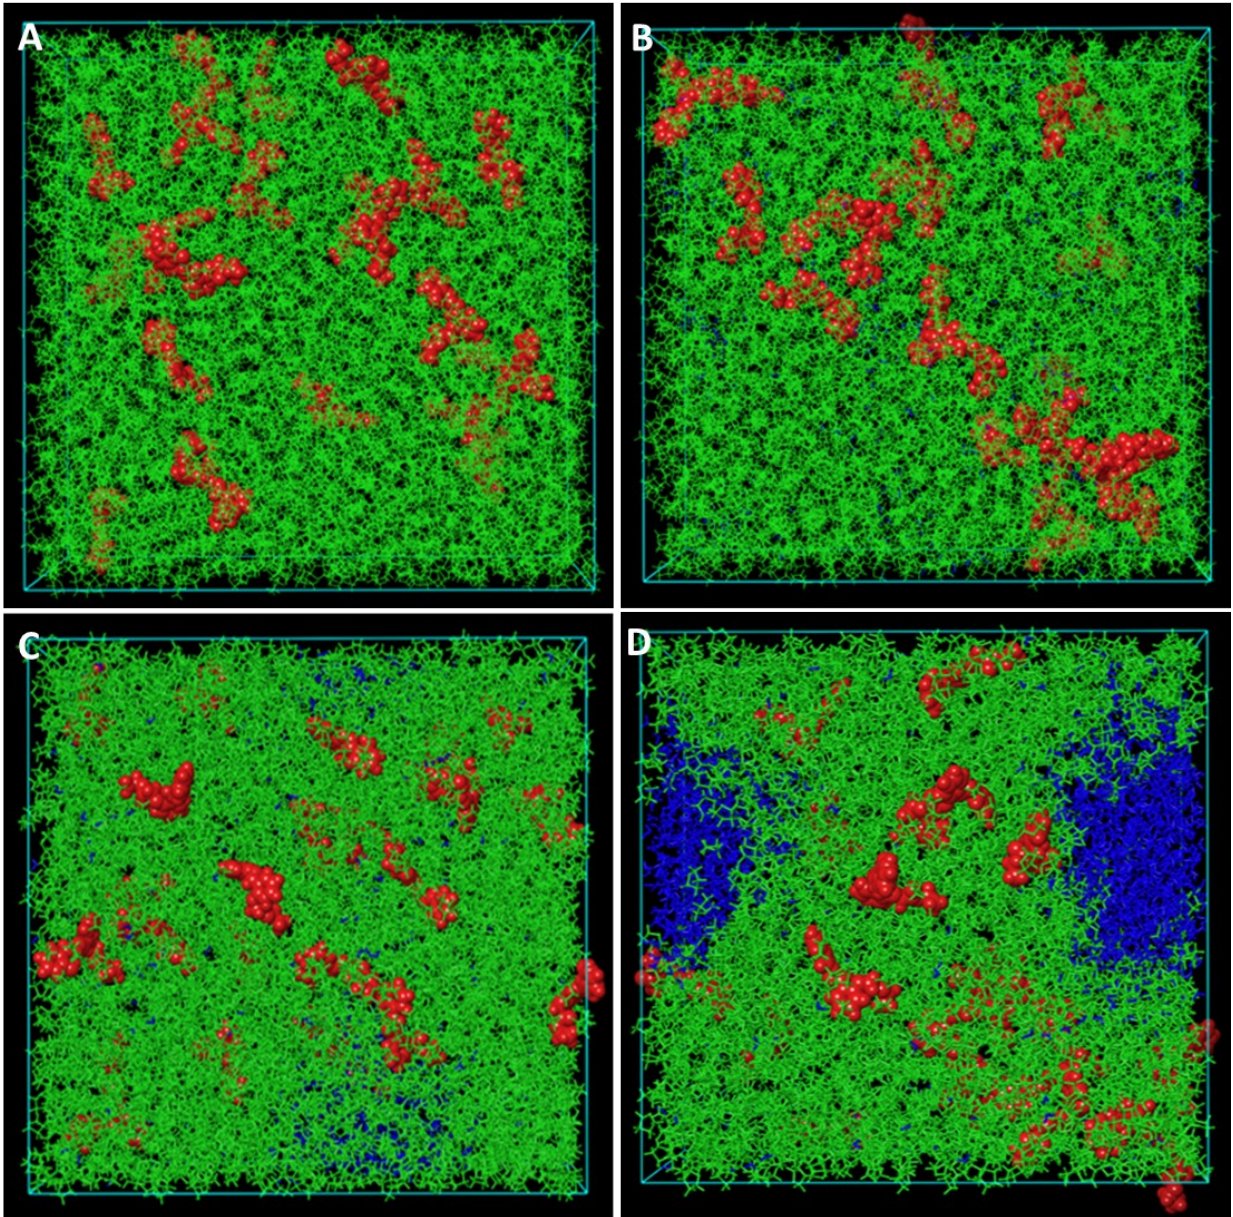

**SF2:** Snapshots of SAE in  $f_w = 0, 10, 20$  and  $50\%$
